# Supplementary material for: Dispersal-competition tradeoff in microbiomes in the quest for land colonization
Source: Sci Rep. 2018 Jun 21;8:9451. doi: 10.1038/s41598-018-27783-6 (PMC6013473; doi:10.1038/s41598-018-27783-6)
Supplement: Supplementary file 1 — Supplementary Information [file 41598_2018_27783_MOESM1_ESM.pdf]

# **Dispersal-competition tradeoff in microbiomes in the quest for land colonization**

**Authors:** Francisco Dini-Andreote<sup>1\*</sup>, Jan Dirk van Elsas<sup>1</sup>, Han Olf<sup>2</sup>, Joana Falcão Salles<sup>1</sup>

## **Supplementary Information**

## Supplementary Tables

**Supplementary Table S1.** Location and physicochemical parameters measured for the samples collected along the salt marsh chronosequence at the island of Schiermonnikoog, The Netherlands. Sampling was performed in the referred months in the year of 2012.

|                                           | Stage 0                             |                     |                   |                  | Stage 5          |                     |                   |                  | Soil stage (in years)<br>Stage 35 |                     |                   |                  | Stage 65         |                     |                   |                  | Stage 105        |                     |                   |                  |
|-------------------------------------------|-------------------------------------|---------------------|-------------------|------------------|------------------|---------------------|-------------------|------------------|-----------------------------------|---------------------|-------------------|------------------|------------------|---------------------|-------------------|------------------|------------------|---------------------|-------------------|------------------|
| Soil physical structure                   |                                     |                     |                   |                  |                  |                     |                   |                  |                                   |                     |                   |                  |                  |                     |                   |                  |                  |                     |                   |                  |
| Silt (%)                                  | 2.7±0.5                             |                     |                   |                  | 2.9±0.1          |                     |                   |                  | 22.3±0.4                          |                     |                   |                  | 44.5±2.2         |                     |                   |                  | 49.0±0.7         |                     |                   |                  |
| Clay (%)                                  | 5.0±0.0                             |                     |                   |                  | 5.0±0.0          |                     |                   |                  | 23.4±1.5                          |                     |                   |                  | 36.2±1.3         |                     |                   |                  | 37.7±0           |                     |                   |                  |
| Sand (%)                                  | 92.3±0.5                            |                     |                   |                  | 92.1±0.1         |                     |                   |                  | 54.3±1.5                          |                     |                   |                  | 19.3±1.0         |                     |                   |                  | 13.3±0.7         |                     |                   |                  |
| Soil chemical parameters                  | Sampling time (in the year of 2012) |                     |                   |                  |                  |                     |                   |                  |                                   |                     |                   |                  |                  |                     |                   |                  |                  |                     |                   |                  |
|                                           | May <sup>a</sup>                    | July <sup>a,b</sup> | Sept <sup>a</sup> | Nov <sup>a</sup> | May <sup>a</sup> | July <sup>a,b</sup> | Sept <sup>a</sup> | Nov <sup>a</sup> | May <sup>a</sup>                  | July <sup>a,b</sup> | Sept <sup>a</sup> | Nov <sup>a</sup> | May <sup>a</sup> | July <sup>a,b</sup> | Sept <sup>a</sup> | Nov <sup>a</sup> | May <sup>a</sup> | July <sup>a,b</sup> | Sept <sup>a</sup> | Nov <sup>a</sup> |
| Soil water content (%)                    | 11±1                                | 11±1                | 12±1              | 13±1             | 7±1              | 7±1                 | 10±1              | 13±0             | 36±2                              | 38±2                | 36±3              | 38±1             | 48±1             | 46±2                | 45±3              | 56±4             | 38±2             | 35±1                | 35±1              | 44±3             |
| pH                                        | 8.7±0.1                             | 8.7±0.1             | 8.6±0.1           | 8.6±0.1          | 8.3±0.1          | 8.3±0.1             | 8.3±0.1           | 8.3±0.1          | 7.7±0.1                           | 7.8±0.1             | 7.8±0.1           | 7.8±0.0          | 7.4±0.0          | 7.4±0.1             | 7.4±0.1           | 7.4±0.1          | 7.6±0.0          | 7.4±0.1             | 7.4±0.1           | 7.5±0.1          |
| Soil organic matter (g dm <sup>-3</sup> ) | 1±0                                 | 1±0                 | 1±0               | 1±0              | 2±1              | 2±1                 | 2±0               | 3±1              | 17±1                              | 15±1                | 14±1              | 15±1             | 47±1             | 38±2                | 33±1              | 33±2             | 32±2             | 31±1                | 34±2              | 28±1             |
| Sulphate (mg dm <sup>-3</sup> )           | 16±3                                | 13±1                | 95±4              | 75±4             | 32±4             | 43±5                | 180±4             | 203±9            | 670±13                            | 130±12              | 113±10            | 53±4             | 704±5            | 550±26              | 452±23            | 67±11            | 539±13           | 423±12              | 498±5             | 416±26           |
| Sodium (mg dm <sup>-3</sup> )             | 155±13                              | 178±19              | 752±88            | 647±182          | 170±15           | 187±9               | 1248±38           | 1587±89          | 6836±240                          | 3782±340            | 4799±457          | 3755±94          | 4533±384         | 6447±204            | 5888±346          | 5200±438         | 5188±624         | 3541±170            | 4654±731          | 5039±687         |
| Total nitrogen (mg kg <sup>-1</sup> )     | 462±50                              | 329±44              | 371±116           | 378±105          | 490±76           | 530±74              | 467±172           | 478±78           | 3232±150                          | 3253±389            | 2606±539          | 2679±209         | 9604±1187        | 8132±1955           | 8580±1785         | 8276±1212        | 6300±1646        | 5833±3003           | 5693±2660         | 5087±2151        |
| Ammonium (mg kg <sup>-1</sup> )           | 5±1                                 | 4±1                 | 4±1               | 4±1              | 6±1              | 6±1                 | 5±2               | 6±1              | 38±3                              | 38±4                | 30±6              | 33±4             | 115±16           | 94±18               | 102±21            | 99±15            | 75±20            | 70±37               | 67±32             | 60±30            |
| Nitrate (mg kg <sup>-1</sup> )            | 3±0                                 | 2±0                 | 2±0               | 2±0              | 3±1              | 3±1                 | 3±1               | 3±1              | 21±2                              | 21±3                | 17±4              | 18±2             | 63±7             | 51±8                | 57±12             | 55±8             | 42±11            | 39±20               | 38±18             | 34±17            |

<sup>a</sup>Quantitative PCR (bacteria and fungi)

<sup>a</sup>Parallel amplicon bacterial 16S rRNA sequencing

<sup>a</sup>Parallel amplicon fungal ITS sequencing

<sup>b</sup>Shotgun metagenome sequencing

**Supplementary Table S2.** Characteristics of the metagenomes generated by Illumina HiSeq2000 for soil samples collected along the salt marsh chronosequence at the island of Schiermonnikoog, The Netherlands.

|                              | Soil stage (in years) |               |               |               |               |               |               |               |               |               |               |               |             |             |               |
|------------------------------|-----------------------|---------------|---------------|---------------|---------------|---------------|---------------|---------------|---------------|---------------|---------------|---------------|-------------|-------------|---------------|
|                              | Stage 0               |               |               | Stage 5       |               |               | Stage 35      |               |               | Stage 65      |               |               | Stage 105   |             |               |
|                              | Plot A                | Plot B        | Plot C        | Plot A        | Plot B        | Plot C        | Plot A        | Plot B        | Plot C        | Plot A        | Plot B        | Plot C        | Plot A      | Plot B      | Plot C        |
| Geographic coordinates       |                       |               |               |               |               |               |               |               |               |               |               |               |             |             |               |
| Latitude                     | 53°30'18"N            | 53°30'18"N    | 53°30'18"N    | 53°30'7"N     | 53°30'7"N     | 53°30'7"N     | 53°29'59"N    | 53°29'59"N    | 53°29'59"N    | 53°29'35"N    | 53°29'35"N    | 53°29'35"N    | 53°28'56"N  | 53°28'56"N  | 53°28'56"N    |
| Longitude                    | 6°19'51"E             | 6°19'51"E     | 6°19'51"E     | 6°19'54"E     | 6°19'54"E     | 6°19'54"E     | 6°18'57"E     | 6°18'57"E     | 6°18'57"E     | 6°16'20"E     | 6°16'20"E     | 6°16'20"E     | 6°14'3"E    | 6°14'3"E    | 6°14'3"E      |
| *Metagenomes                 |                       |               |               |               |               |               |               |               |               |               |               |               |             |             |               |
| MG-RAST ID                   | 4558897.3             | 4558900.3     | 4558903.3     | 4558906.3     | 4558909.3     | 4558912.3     | 4558915.3     | 4558918.3     | 4558921.3     | 4558924.3     | 4558927.3     | 4558930.3     | 4558933.3   | 4558936.3   | 4558939.3     |
| Metagenome size (bp)         | 1 946 098 904         | 3 039 009 260 | 1 729 121 135 | 1 985 828 415 | 2 470 040 059 | 2 541 714 674 | 2 876 930 138 | 1 658 957 366 | 2 169 497 340 | 1 883 521 083 | 1 814 228 985 | 1 103 890 408 | 384 386 953 | 503 545 455 | 2 659 532 084 |
| Average sequence length (bp) | 156 ± 27              | 157 ± 28      | 159 ± 29      | 164 ± 32      | 159 ± 29      | 150 ± 24      | 156 ± 26      | 157 ± 28      | 155 ± 27      | 155 ± 27      | 165 ± 33      | 167 ± 32      | 170 ± 34    | 167 ± 34    | 156 ± 28      |
| Number of sequences          | 12 450 878            | 19 321 585    | 10 839 811    | 12 107 696    | 15 534 513    | 16 934 258    | 18 408 001    | 10 533 784    | 13 947 451    | 12 123 756    | 10 969 050    | 6 599 703     | 2 258 688   | 2 999 891   | 16 987 073    |
| GC content (%)               | 56 ± 12               | 56 ± 12       | 54 ± 12       | 56 ± 12       | 56 ± 12       | 56 ± 12       | 55 ± 11       | 54 ± 11       | 55 ± 11       | 57 ± 10       | 56 ± 11       | 55 ± 11       | 55 ± 11     | 57 ± 10     | 57 ± 10       |
| Number of predicted ORFs     | 11 596 311            | 17 647 296    | 10 070 537    | 11 124 734    | 14 473 485    | 15 374 314    | 17 155 698    | 9 823 968     | 13 024 803    | 11 275 236    | 10 201 327    | 6 140 974     | 2 057 545   | 2 794 317   | 15 889 995    |
| ORFs with predicted function | 3 934 757             | 5 853 920     | 3 272 425     | 4 105 274     | 5 645 080     | 5 925 433     | 5 285 542     | 3 104 792     | 3 894 995     | 3 794 182     | 3 610 530     | 2 181 005     | 755 878     | 1 025 318   | 5 627 796     |
| Bacteria (%)                 | 96.1                  | 95.8          | 95.7          | 97            | 97.5          | 97.5          | 95.5          | 95.6          | 95.8          | 96.7          | 97.2          | 96.9          | 97.1        | 97.1        | 97.1          |
| Eukarya (%)                  | 2.1                   | 2.5           | 2.4           | 1.8           | 1.6           | 1.8           | 2.1           | 2.1           | 1.9           | 1.5           | 1.4           | 1.5           | 1.8         | 1.3         | 1.3           |
| Archaea (%)                  | 1.5                   | 1.4           | 1.6           | 1.1           | 0.8           | 0.6           | 2.1           | 2             | 2.1           | 1.6           | 1.2           | 1.4           | 0.9         | 1.4         | 1.4           |
| KO matches                   | 1 565 010             | 2 391 486     | 1 293 459     | 1 618 989     | 2 173 227     | 2 387 195     | 2 065 112     | 1 202 620     | 1 526 363     | 1 486 222     | 1 392 578     | 835 141       | 298 105     | 396 573     | 2 188 639     |
| CAZy matches                 | 102 392               | 157 078       | 87 041        | 126 660       | 161 093       | 161 471       | 174 120       | 99 232        | 130 412       | 116 255       | 118 351       | 73 099        | 25 784      | 33 566      | 175 447       |
| ARG matches                  | 84 995                | 131 065       | 73 283        | 100 002       | 120 458       | 113 877       | 123 456       | 72 389        | 93 161        | 88 463        | 99 059        | 60 103        | 21 635      | 28 837      | 13 7611       |

<sup>a</sup>Post QC values

**Supplementary Table S3.** Overall and pairwise comparisons of KO, ARGs and CAZy community profiles across five soil stages analysed using PERMANOVA (Bray-Curtis distance) with  $10^3$  permutations. Abbreviations: MS, mean sum of squares; SS, sum of squares.

| KEEG Orthology (KOs)              |         |         |          |          |           |
|-----------------------------------|---------|---------|----------|----------|-----------|
| Source                            | d.f.    | SS      | MS       | Pseudo-F | P-value   |
| Soil stages                       | 4       | 282.24  | 70.559   | 6.7683   | 0.001     |
| Residuals                         | 10      | 104.25  | 10.425   |          |           |
| Total                             | 14      | 386.48  |          |          |           |
| Average similarity between stages |         |         |          |          |           |
|                                   | Stage 0 | Stage 5 | Stage 35 | Stage 65 | Stage 105 |
| Stage 0                           | 96.267  |         |          |          |           |
| Stage 5                           | 92.361  | 95.262  |          |          |           |
| Stage 35                          | 92.801  | 91.858  | 96.612   |          |           |
| Stage 65                          | 91.003  | 92.525  | 93.597   | 95.363   |           |
| Stage 105                         | 90.31   | 92.254  | 92.086   | 94.408   | 94.222    |
| ARGs (Soil resistome)             |         |         |          |          |           |
| Source                            | d.f.    | SS      | MS       | Pseudo-F | P-value   |
| Soil stages                       | 4       | 330.33  | 82.583   | 7.1732   | 0.001     |
| Residuals                         | 10      | 115.13  | 11.513   |          |           |
| Total                             | 14      | 445.46  |          |          |           |
| Average similarity between stages |         |         |          |          |           |
|                                   | Stage 0 | Stage 5 | Stage 35 | Stage 65 | Stage 105 |
| Stage 0                           | 97.537  |         |          |          |           |
| Stage 5                           | 93.373  | 94.617  |          |          |           |
| Stage 35                          | 95.919  | 93.428  | 97.635   |          |           |
| Stage 65                          | 90.506  | 92.843  | 91.391   | 94.456   |           |
| Stage 105                         | 88.677  | 91.458  | 89.337   | 94.691   | 94.097    |
| CAZy                              |         |         |          |          |           |
| Source                            | d.f.    | SS      | MS       | Pseudo-F | P-value   |
| Soil stages                       | 4       | 439.44  | 109.86   | 12.209   | 0.001     |
| Residuals                         | 10      | 89.979  | 8.9979   |          |           |
| Total                             | 14      | 529.42  |          |          |           |
| Average similarity between stages |         |         |          |          |           |
|                                   | Stage 0 | Stage 5 | Stage 35 | Stage 65 | Stage 105 |
| Stage 0                           | 96.917  |         |          |          |           |
| Stage 5                           | 89.661  | 95.625  |          |          |           |
| Stage 35                          | 90.774  | 92.961  | 97.228   |          |           |
| Stage 65                          | 87.841  | 92.526  | 93.286   | 95.157   |           |
| Stage 105                         | 86.475  | 91.703  | 91.377   | 94.829   | 94.813    |
| Bacterial 16S rRNA                |         |         |          |          |           |
| Source                            | d.f.    | SS      | MS       | Pseudo-F | P-value   |
| Soil stages                       | 4       | 20051   | 5012.7   | 3.9968   | 0.001     |
| Residuals                         | 10      | 12542   | 1254.2   |          |           |
| Total                             | 14      | 32592   |          |          |           |
| Average similarity between stages |         |         |          |          |           |
|                                   | Stage 0 | Stage 5 | Stage 35 | Stage 65 | Stage 105 |
| Stage 0                           | 49.955  |         |          |          |           |
| Stage 5                           | 30.826  | 46.589  |          |          |           |
| Stage 35                          | 20.308  | 24.118  | 51.268   |          |           |
| Stage 65                          | 21.179  | 27.235  | 37.319   | 48.475   |           |
| Stage 105                         | 22.663  | 30.452  | 36.088   | 46.805   | 53.684    |
| Fungal ITS                        |         |         |          |          |           |
| Source                            | d.f.    | SS      | MS       | Pseudo-F | P-value   |
| Soil stages                       | 4       | 31007   | 7751.8   | 6.8323   | 0.001     |
| Residuals                         | 10      | 11346   | 1134.6   |          |           |
| Total                             | 14      | 42353   |          |          |           |
| Average similarity between stages |         |         |          |          |           |
|                                   | Stage 0 | Stage 5 | Stage 35 | Stage 65 | Stage 105 |
| Stage 0                           | 43.268  |         |          |          |           |
| Stage 5                           | 17.903  | 49.15   |          |          |           |
| Stage 35                          | 15.766  | 18.295  | 57.567   |          |           |
| Stage 65                          | 15.624  | 22.596  | 12.554   | 53.396   |           |
| Stage 105                         | 15.112  | 22.053  | 11.167   | 34.472   | 60.832    |

**Supplementary Table S4.** Spearman's correlation ( $\rho$  values), determined via RELATE tests, relating pairwise community composition (bacterial 16S rRNA, fungal ITS) and metagenomic distances (KO, ARGs, CAZy) based on Bray-Curtis distances.

|                                 | $\rho$ | P-value |
|---------------------------------|--------|---------|
| <b>Bacterial 16S rRNA, KO</b>   | 0.782  | 0.001   |
| <b>Bacterial 16S rRNA, ARG</b>  | 0.263  | 0.021   |
| <b>Bacterial 16S rRNA, CAZy</b> | 0.729  | 0.001   |
| <b>Fungal ITS, CAZy</b>         | 0.556  | 0.001   |

**Supplementary Table S5.** Layer decision of KOs, ARG mechanisms and CAZy families identified using random forest analysis with 1,000 trees followed by the Boruta algorithm for feature selection (average z-scores of 1,000 runs > 4).

| KEEG Orthologs (KOs)             |                  |                  |                  |
|----------------------------------|------------------|------------------|------------------|
| KO level 3                       | KO ID            | Layer decision   | Layer importance |
| Bacterial chemotaxis             | K00575           | Rejected         | Inf              |
| Bacterial chemotaxis             | K03406           | <i>Confirmed</i> | 10.1505          |
| Bacterial chemotaxis             | K03407           | <i>Confirmed</i> | 12.9054          |
| Bacterial chemotaxis             | K03408           | <i>Confirmed</i> | 8.8730           |
| Bacterial chemotaxis             | K03412           | <i>Confirmed</i> | 8.7897           |
| Bacterial chemotaxis             | K03413           | <i>Confirmed</i> | 10.5524          |
| Bacterial chemotaxis             | K05874           | <i>Confirmed</i> | 11.9026          |
| Bacterial chemotaxis             | K05875           | <i>Confirmed</i> | 8.3797           |
| KEEG Orthologs (KOs)             |                  |                  |                  |
| KO level 3                       | KO ID            | Layer decision   | Layer importance |
| Flagellar assembly               | K02387           | Rejected         | Inf              |
| Flagellar assembly               | K02388           | Tentative        | 3.7512           |
| Flagellar assembly               | K02389           | Rejected         | Inf              |
| Flagellar assembly               | K02390           | <i>Confirmed</i> | 4.8603           |
| Flagellar assembly               | K02391           | <i>Confirmed</i> | 6.2569           |
| Flagellar assembly               | K02392           | <i>Confirmed</i> | 4.2732           |
| Flagellar assembly               | K02393           | Rejected         | Inf              |
| Flagellar assembly               | K02394           | <i>Confirmed</i> | 5.9072           |
| Flagellar assembly               | K02396           | <i>Confirmed</i> | 4.5166           |
| Flagellar assembly               | K02397           | Rejected         | Inf              |
| Flagellar assembly               | K02400           | Rejected         | Inf              |
| Flagellar assembly               | K02401           | Tentative        | 3.9386           |
| Flagellar assembly               | K02406           | <i>Confirmed</i> | 6.7124           |
| Flagellar assembly               | K02407           | <i>Confirmed</i> | 5.6035           |
| Flagellar assembly               | K02408           | <i>Confirmed</i> | 7.8791           |
| Flagellar assembly               | K02409           | <i>Confirmed</i> | 4.5325           |
| Flagellar assembly               | K02410           | <i>Confirmed</i> | 5.6311           |
| Flagellar assembly               | K02411           | <i>Confirmed</i> | 4.7666           |
| Flagellar assembly               | K02412           | <i>Confirmed</i> | 5.6361           |
| Flagellar assembly               | K02413           | Rejected         | Inf              |
| Flagellar assembly               | K02414           | Rejected         | Inf              |
| Flagellar assembly               | K02416           | Tentative        | 4.0559           |
| Flagellar assembly               | K02417           | <i>Confirmed</i> | 5.8813           |
| Flagellar assembly               | K02418           | Rejected         | Inf              |
| Flagellar assembly               | K02419           | Rejected         | Inf              |
| Flagellar assembly               | K02420           | Rejected         | Inf              |
| Flagellar assembly               | K02421           | Tentative        | 3.8170           |
| Flagellar assembly               | K02556           | Rejected         | Inf              |
| Flagellar assembly               | K02557           | <i>Confirmed</i> | 5.4375           |
| ARGs (Soil resistomes)           |                  |                  |                  |
| Mechanism                        | Layer decision   | Layer importance |                  |
| ABC transporter                  | <i>Confirmed</i> | 7.1482           |                  |
| Acetyltransferase                | <i>Confirmed</i> | 6.9241           |                  |
| Aminotransferase                 | Rejected         | Inf              |                  |
| Beta-lactamase                   | <i>Confirmed</i> | 6.8547           |                  |
| D-ala D-ala ligase               | Rejected         | Inf              |                  |
| Gene modulating resistance       | <i>Confirmed</i> | 5.6460           |                  |
| Glycopeptide resistance          | Rejected         | Inf              |                  |
| Methyltransferase                | Rejected         | Inf              |                  |
| MFS transporter                  | <i>Confirmed</i> | 8.7414           |                  |
| Other efflux                     | <i>Confirmed</i> | 4.9721           |                  |
| Phosphotransferase               | <i>Confirmed</i> | 7.8383           |                  |
| Quinolone resistance             | Rejected         | Inf              |                  |
| RND antibiotic efflux            | Rejected         | Inf              |                  |
| rRNA methyltransferase           | Rejected         | Inf              |                  |
| Stress response                  | Rejected         | Inf              |                  |
| Target protection                | Rejected         | Inf              |                  |
| Target redundancy/overexpression | Rejected         | Inf              |                  |

| CAZymes |             |                  |                  |
|---------|-------------|------------------|------------------|
| Class   | Gene family | Layer decision   | Layer importance |
| AA      | AA1         | Tentative        | 2.8021           |
| AA      | AA10        | <b>Confirmed</b> | 3.5571           |
| AA      | AA2         | Rejected         | Inf              |
| AA      | AA3         | <b>Confirmed</b> | 3.7742           |
| AA      | AA4         | Tentative        | 2.9352           |
| AA      | AA5         | Rejected         | Inf              |
| AA      | AA6         | Rejected         | Inf              |
| AA      | AA7         | <b>Confirmed</b> | 3.4470           |
| AA      | AA8         | Rejected         | Inf              |
| AA      | AA9         | Rejected         | Inf              |
| CBM     | CBM1        | Rejected         | Inf              |
| CBM     | CBM10       | Rejected         | Inf              |
| CBM     | CBM11       | Rejected         | Inf              |
| CBM     | CBM12       | Rejected         | Inf              |
| CBM     | CBM13       | <b>Confirmed</b> | 4.1255           |
| CBM     | CBM14       | Rejected         | Inf              |
| CBM     | CBM15       | Rejected         | Inf              |
| CBM     | CBM16       | Rejected         | Inf              |
| CBM     | CBM17       | Rejected         | Inf              |
| CBM     | CBM18       | Rejected         | Inf              |
| CBM     | CBM19       | Rejected         | Inf              |
| CBM     | CBM2        | Rejected         | Inf              |
| CBM     | CBM20       | Rejected         | Inf              |
| CBM     | CBM21       | Rejected         | Inf              |
| CBM     | CBM22       | Rejected         | Inf              |
| CBM     | CBM23       | Rejected         | Inf              |
| CBM     | CBM25       | Rejected         | Inf              |
| CBM     | CBM26       | Rejected         | Inf              |
| CBM     | CBM27       | Rejected         | Inf              |
| CBM     | CBM28       | Rejected         | Inf              |
| CBM     | CBM29       | Rejected         | Inf              |
| CBM     | CBM3        | Rejected         | Inf              |
| CBM     | CBM30       | Rejected         | Inf              |
| CBM     | CBM31       | Rejected         | Inf              |
| CBM     | CBM32       | Rejected         | Inf              |
| CBM     | CBM34       | Rejected         | Inf              |
| CBM     | CBM35       | Rejected         | Inf              |
| CBM     | CBM36       | Rejected         | Inf              |
| CBM     | CBM37       | Rejected         | Inf              |
| CBM     | CBM38       | Rejected         | Inf              |
| CBM     | CBM39       | Rejected         | Inf              |
| CBM     | CBM4        | Rejected         | Inf              |
| CBM     | CBM40       | Rejected         | Inf              |
| CBM     | CBM41       | Rejected         | Inf              |
| CBM     | CBM42       | Rejected         | Inf              |
| CBM     | CBM43       | Rejected         | Inf              |
| CBM     | CBM44       | Rejected         | Inf              |
| CBM     | CBM45       | Rejected         | Inf              |
| CBM     | CBM46       | Rejected         | Inf              |
| CBM     | CBM47       | Rejected         | Inf              |
| CBM     | CBM48       | Rejected         | Inf              |
| CBM     | CBM49       | Rejected         | Inf              |
| CBM     | CBM5        | Rejected         | Inf              |
| CBM     | CBM50       | <b>Confirmed</b> | 3.5038           |
| CBM     | CBM51       | Rejected         | Inf              |
| CBM     | CBM52       | Rejected         | Inf              |
| CBM     | CBM53       | Rejected         | Inf              |
| CBM     | CBM54       | Rejected         | Inf              |
| CBM     | CBM55       | Rejected         | Inf              |
| CBM     | CBM56       | Rejected         | Inf              |
| CBM     | CBM57       | Rejected         | Inf              |
| CBM     | CBM58       | Rejected         | Inf              |
| CBM     | CBM59       | Rejected         | Inf              |
| CBM     | CBM6        | <b>Confirmed</b> | 3.9650           |
| CBM     | CBM60       | Rejected         | Inf              |
| CBM     | CBM61       | Rejected         | Inf              |
| CBM     | CBM62       | Tentative        | 3.0064           |
| CBM     | CBM63       | Rejected         | Inf              |
| CBM     | CBM64       | Rejected         | Inf              |
| CBM     | CBM65       | Rejected         | Inf              |
| CBM     | CBM66       | Rejected         | Inf              |
| CBM     | CBM67       | Tentative        | 2.9440           |
| CBM     | CBM8        | Rejected         | Inf              |
| CBM     | CBM9        | Rejected         | Inf              |
| CE      | CE1         | Rejected         | Inf              |
| CE      | CE10        | <b>Confirmed</b> | 3.2091           |
| CE      | CE11        | Rejected         | Inf              |
| CE      | CE12        | <b>Confirmed</b> | 4.1835           |
| CE      | CE13        | Rejected         | Inf              |
| CE      | CE14        | <b>Confirmed</b> | 3.5636           |
| CE      | CE15        | Tentative        | 2.9137           |
| CE      | CE16        | Rejected         | Inf              |
| CE      | CE2         | Tentative        | 3.0742           |
| CE      | CE3         | Rejected         | Inf              |
| CE      | CE4         | <b>Confirmed</b> | 3.3585           |
| CE      | CE5         | <b>Confirmed</b> | 3.8010           |
| CE      | CE6         | Rejected         | Inf              |
| CE      | CE7         | <b>Confirmed</b> | 3.2828           |
| CE      | CE8         | Rejected         | Inf              |
| CE      | CE9         | Rejected         | Inf              |
| GH      | GH1         | Rejected         | Inf              |
| GH      | GH10        | Tentative        | 3.0285           |
| GH      | GH100       | <b>Confirmed</b> | 3.8906           |
| GH      | GH101       | Rejected         | Inf              |
| GH      | GH102       | Rejected         | Inf              |

|    |       |                  |        |
|----|-------|------------------|--------|
| GH | GH103 | Rejected         | Inf    |
| GH | GH104 | Rejected         | Inf    |
| GH | GH105 | Rejected         | Inf    |
| GH | GH106 | Rejected         | Inf    |
| GH | GH107 | Rejected         | Inf    |
| GH | GH108 | Rejected         | Inf    |
| GH | GH109 | <b>Confirmed</b> | 3,3174 |
| GH | GH11  | Rejected         | Inf    |
| GH | GH110 | Rejected         | Inf    |
| GH | GH111 | Rejected         | Inf    |
| GH | GH112 | Rejected         | Inf    |
| GH | GH113 | Rejected         | Inf    |
| GH | GH114 | Rejected         | Inf    |
| GH | GH115 | <b>Confirmed</b> | 3,1135 |
| GH | GH116 | Rejected         | Inf    |
| GH | GH117 | Rejected         | Inf    |
| GH | GH118 | Rejected         | Inf    |
| GH | GH119 | Rejected         | Inf    |
| GH | GH12  | Rejected         | Inf    |
| GH | GH120 | Rejected         | Inf    |
| GH | GH121 | Rejected         | Inf    |
| GH | GH122 | Rejected         | Inf    |
| GH | GH123 | Rejected         | Inf    |
| GH | GH124 | Rejected         | Inf    |
| GH | GH125 | Rejected         | Inf    |
| GH | GH126 | Rejected         | Inf    |
| GH | GH127 | <b>Confirmed</b> | 3,4860 |
| GH | GH128 | Rejected         | Inf    |
| GH | GH129 | Rejected         | Inf    |
| GH | GH13  | Rejected         | Inf    |
| GH | GH130 | <b>Confirmed</b> | 3,7615 |
| GH | GH131 | Rejected         | Inf    |
| GH | GH132 | Rejected         | Inf    |
| GH | GH14  | Rejected         | Inf    |
| GH | GH15  | Rejected         | Inf    |
| GH | GH16  | Rejected         | Inf    |
| GH | GH17  | Rejected         | Inf    |
| GH | GH18  | Rejected         | Inf    |
| GH | GH19  | Rejected         | Inf    |
| GH | GH2   | Tentative        | 2,8451 |
| GH | GH20  | Rejected         | Inf    |
| GH | GH22  | Rejected         | Inf    |
| GH | GH23  | Rejected         | Inf    |
| GH | GH24  | Rejected         | Inf    |
| GH | GH25  | Rejected         | Inf    |
| GH | GH26  | Rejected         | Inf    |
| GH | GH27  | Rejected         | Inf    |
| GH | GH28  | Rejected         | Inf    |
| GH | GH29  | Tentative        | 3,0446 |
| GH | GH3   | Rejected         | Inf    |
| GH | GH30  | Tentative        | 3,0678 |
| GH | GH31  | Rejected         | Inf    |
| GH | GH32  | Rejected         | Inf    |
| GH | GH33  | Rejected         | Inf    |
| GH | GH35  | <b>Confirmed</b> | 4,0238 |
| GH | GH36  | <b>Confirmed</b> | 3,8866 |
| GH | GH37  | Rejected         | Inf    |
| GH | GH38  | Rejected         | Inf    |
| GH | GH39  | <b>Confirmed</b> | 3,8047 |
| GH | GH4   | <b>Confirmed</b> | 3,3554 |
| GH | GH42  | <b>Confirmed</b> | 3,4475 |
| GH | GH43  | Rejected         | Inf    |
| GH | GH44  | <b>Confirmed</b> | 3,1113 |
| GH | GH45  | Rejected         | Inf    |
| GH | GH46  | Rejected         | Inf    |
| GH | GH47  | Rejected         | Inf    |
| GH | GH48  | Rejected         | Inf    |
| GH | GH49  | Rejected         | Inf    |
| GH | GH5   | Rejected         | Inf    |
| GH | GH50  | <b>Confirmed</b> | 3,4836 |
| GH | GH51  | Rejected         | Inf    |
| GH | GH52  | Rejected         | Inf    |
| GH | GH53  | Rejected         | Inf    |
| GH | GH54  | Tentative        | 3,0008 |
| GH | GH55  | <b>Confirmed</b> | 3,5308 |
| GH | GH56  | Rejected         | Inf    |
| GH | GH57  | Rejected         | Inf    |
| GH | GH58  | Rejected         | Inf    |
| GH | GH59  | Rejected         | Inf    |
| GH | GH6   | <b>Confirmed</b> | 3,2089 |
| GH | GH62  | Rejected         | Inf    |
| GH | GH63  | Rejected         | Inf    |
| GH | GH64  | Rejected         | Inf    |
| GH | GH65  | Rejected         | Inf    |
| GH | GH66  | Rejected         | Inf    |
| GH | GH67  | Rejected         | Inf    |
| GH | GH68  | Rejected         | Inf    |
| GH | GH7   | Rejected         | Inf    |
| GH | GH70  | Rejected         | Inf    |
| GH | GH71  | Rejected         | Inf    |
| GH | GH72  | Rejected         | Inf    |
| GH | GH73  | Rejected         | Inf    |
| GH | GH74  | Rejected         | Inf    |
| GH | GH75  | Rejected         | Inf    |
| GH | GH76  | Rejected         | Inf    |
| GH | GH77  | Rejected         | Inf    |
| GH | GH78  | <b>Confirmed</b> | 3,7183 |
| GH | GH79  | Rejected         | Inf    |
| GH | GH8   | Rejected         | Inf    |

|    |      |                  |        |
|----|------|------------------|--------|
| GH | GH80 | Rejected         | Inf    |
| GH | GH81 | Rejected         | Inf    |
| GH | GH82 | Rejected         | Inf    |
| GH | GH83 | Rejected         | Inf    |
| GH | GH84 | Rejected         | Inf    |
| GH | GH85 | Rejected         | Inf    |
| GH | GH86 | Rejected         | Inf    |
| GH | GH87 | Rejected         | Inf    |
| GH | GH88 | Rejected         | Inf    |
| GH | GH89 | Tentative        | 2.8080 |
| GH | GH9  | Rejected         | Inf    |
| GH | GH90 | Rejected         | Inf    |
| GH | GH91 | Rejected         | Inf    |
| GH | GH92 | Rejected         | Inf    |
| GH | GH93 | Rejected         | Inf    |
| GH | GH94 | <b>Confirmed</b> | 3.3032 |
| GH | GH95 | Rejected         | Inf    |
| GH | GH96 | Rejected         | Inf    |
| GH | GH97 | Rejected         | Inf    |
| GH | GH98 | <b>Confirmed</b> | 3.1358 |
| GH | GH99 | Rejected         | Inf    |
| GT | GT1  | <b>Confirmed</b> | 3.1364 |
| GT | GT10 | <b>Confirmed</b> | 3.5962 |
| GT | GT11 | Rejected         | Inf    |
| GT | GT12 | Rejected         | Inf    |
| GT | GT13 | Rejected         | Inf    |
| GT | GT14 | Rejected         | Inf    |
| GT | GT15 | Rejected         | Inf    |
| GT | GT16 | Rejected         | Inf    |
| GT | GT17 | Rejected         | Inf    |
| GT | GT18 | Rejected         | Inf    |
| GT | GT19 | Rejected         | Inf    |
| GT | GT2  | Rejected         | Inf    |
| GT | GT20 | <b>Confirmed</b> | 3.0824 |
| GT | GT21 | Rejected         | Inf    |
| GT | GT22 | Rejected         | Inf    |
| GT | GT23 | Rejected         | Inf    |
| GT | GT24 | Tentative        | 2.7951 |
| GT | GT25 | <b>Confirmed</b> | 4.2333 |
| GT | GT26 | Rejected         | Inf    |
| GT | GT27 | Rejected         | Inf    |
| GT | GT28 | Rejected         | Inf    |
| GT | GT29 | Rejected         | Inf    |
| GT | GT3  | Rejected         | Inf    |
| GT | GT30 | Rejected         | Inf    |
| GT | GT31 | Rejected         | Inf    |
| GT | GT32 | Rejected         | Inf    |
| GT | GT33 | Rejected         | Inf    |
| GT | GT34 | Rejected         | Inf    |
| GT | GT35 | <b>Confirmed</b> | 3.3479 |
| GT | GT37 | Rejected         | Inf    |
| GT | GT38 | Rejected         | Inf    |
| GT | GT39 | Rejected         | Inf    |
| GT | GT4  | <b>Confirmed</b> | 3.1818 |
| GT | GT40 | Rejected         | Inf    |
| GT | GT41 | Rejected         | Inf    |
| GT | GT42 | Rejected         | Inf    |
| GT | GT43 | Rejected         | Inf    |
| GT | GT44 | Rejected         | Inf    |
| GT | GT45 | Rejected         | Inf    |
| GT | GT46 | <b>Confirmed</b> | 3.6020 |
| GT | GT47 | <b>Confirmed</b> | 3.1583 |
| GT | GT48 | Rejected         | Inf    |
| GT | GT49 | Rejected         | Inf    |
| GT | GT5  | Rejected         | Inf    |
| GT | GT50 | Rejected         | Inf    |
| GT | GT51 | <b>Confirmed</b> | 3.3192 |
| GT | GT52 | Rejected         | Inf    |
| GT | GT53 | Confirmed        | 3.2380 |
| GT | GT54 | Rejected         | Inf    |
| GT | GT55 | <b>Confirmed</b> | 3.3647 |
| GT | GT56 | Rejected         | Inf    |
| GT | GT57 | Rejected         | Inf    |
| GT | GT58 | Rejected         | Inf    |
| GT | GT59 | Rejected         | Inf    |
| GT | GT6  | Rejected         | Inf    |
| GT | GT60 | <b>Confirmed</b> | 3.3647 |
| GT | GT61 | Rejected         | Inf    |
| GT | GT62 | Rejected         | Inf    |
| GT | GT63 | Rejected         | Inf    |
| GT | GT64 | Rejected         | Inf    |
| GT | GT65 | Rejected         | Inf    |
| GT | GT66 | Tentative        | 3.0183 |
| GT | GT67 | Rejected         | Inf    |
| GT | GT68 | Rejected         | Inf    |
| GT | GT69 | Rejected         | Inf    |
| GT | GT7  | Rejected         | Inf    |
| GT | GT70 | Rejected         | Inf    |
| GT | GT71 | Rejected         | Inf    |
| GT | GT72 | Rejected         | Inf    |
| GT | GT73 | Rejected         | Inf    |
| GT | GT74 | Tentative        | 3.0000 |
| GT | GT75 | Rejected         | Inf    |
| GT | GT76 | Rejected         | Inf    |
| GT | GT77 | Rejected         | Inf    |
| GT | GT78 | Rejected         | Inf    |
| GT | GT79 | Rejected         | Inf    |
| GT | GT8  | Rejected         | Inf    |
| GT | GT80 | Rejected         | Inf    |

|    |      |                  |        |
|----|------|------------------|--------|
| GT | GT81 | Rejected         | Inf    |
| GT | GT82 | Rejected         | Inf    |
| GT | GT83 | Tentative        | 2.9641 |
| GT | GT84 | Rejected         | Inf    |
| GT | GT85 | Rejected         | Inf    |
| GT | GT87 | Rejected         | Inf    |
| GT | GT88 | Rejected         | Inf    |
| GT | GT89 | Rejected         | Inf    |
| GT | GT9  | Rejected         | Inf    |
| GT | GT90 | Rejected         | Inf    |
| GT | GT91 | Rejected         | Inf    |
| GT | GT92 | Rejected         | Inf    |
| GT | GT93 | Tentative        | 2.8188 |
| GT | GT94 | Rejected         | Inf    |
| PL | PL1  | <b>Confirmed</b> | 3.8243 |
| PL | PL10 | Rejected         | Inf    |
| PL | PL11 | <b>Confirmed</b> | 4.6552 |
| PL | PL12 | <b>Confirmed</b> | 3.6877 |
| PL | PL13 | Rejected         | Inf    |
| PL | PL14 | Rejected         | Inf    |
| PL | PL15 | Rejected         | Inf    |
| PL | PL16 | Rejected         | Inf    |
| PL | PL17 | Rejected         | Inf    |
| PL | PL18 | Rejected         | Inf    |
| PL | PL2  | Rejected         | Inf    |
| PL | PL20 | Rejected         | Inf    |
| PL | PL21 | Rejected         | Inf    |
| PL | PL22 | <b>Confirmed</b> | 3.2002 |
| PL | PL3  | Rejected         | Inf    |
| PL | PL4  | Rejected         | Inf    |
| PL | PL5  | Rejected         | Inf    |
| PL | PL6  | Rejected         | Inf    |
| PL | PL7  | Rejected         | Inf    |
| PL | PL8  | Rejected         | Inf    |
| PL | PL9  | <b>Confirmed</b> | 3.3642 |

## Supplementary Figures

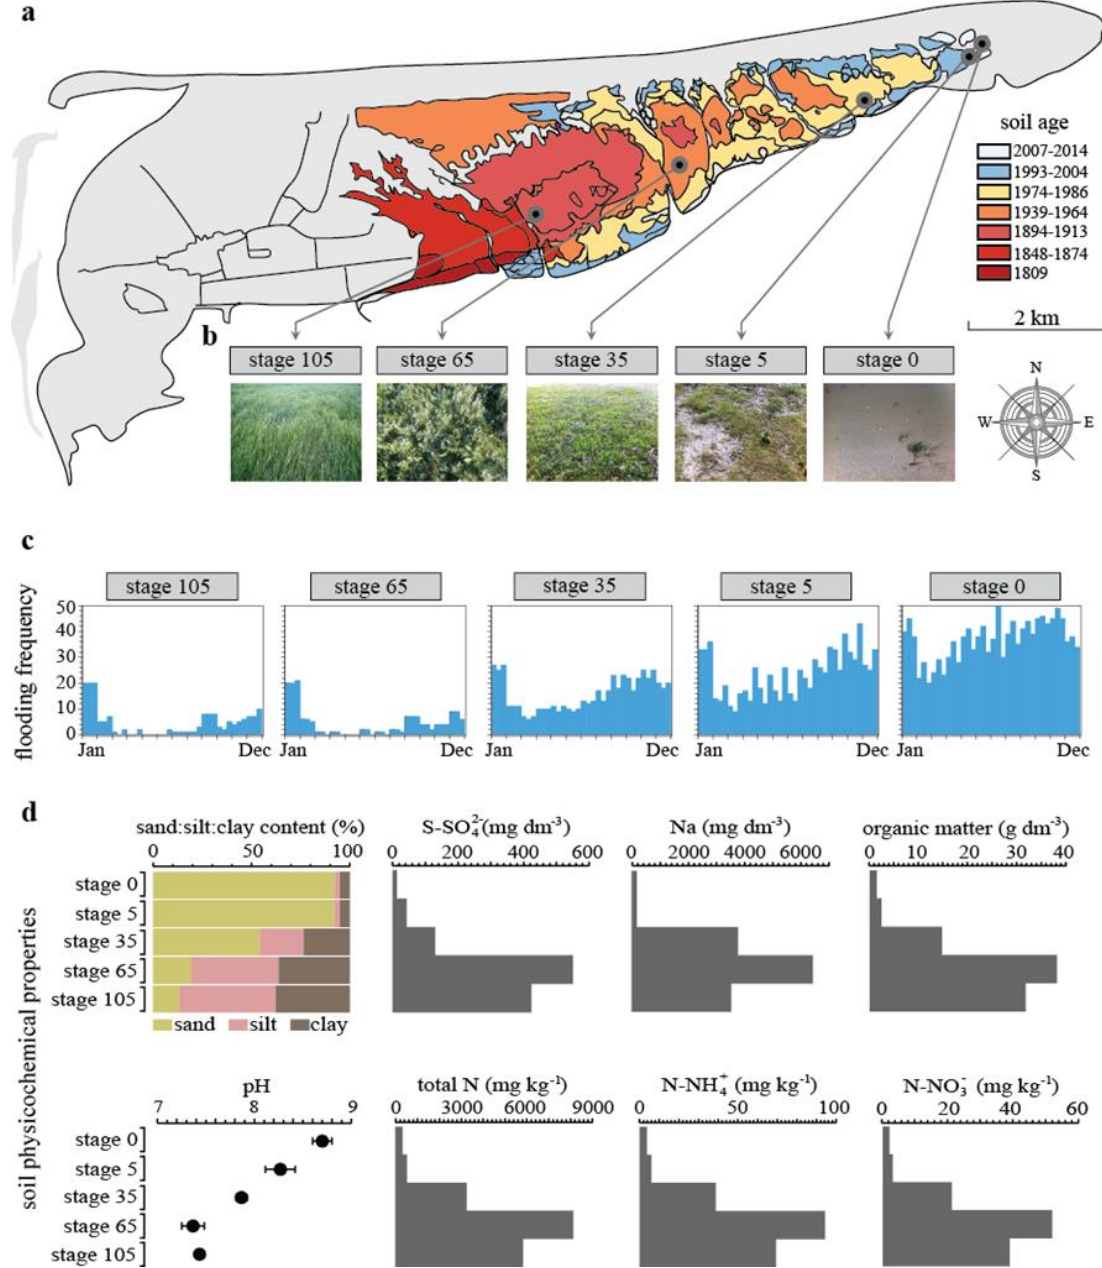

**Supplementary Fig. S1. Map of the island of Schiermonnikoog, the Netherlands (N53°30' E6°10') and characteristics of the soil stages across the chronosequence.** (a) The scaled map depicts the chronology of the geogenesis along the gradual eastward extension of the island, dating from 1809 to 2014. Throughout the development of this ecosystem, different stages of soil formation were precisely located (see Materials and Methods), named as stages 0, 5, 35, 65 and 105 (in years of soil development). (b) Photographs of each plot taken in July 2012. (c) Bar charts depict the flooding frequency (i.e., number of times each plot was flooded) per month along the year of 2012 (scaled 0 to 50). (d) Physicochemical data display soil sand:silt:clay content (%), sulphate (S-SO<sub>4</sub><sup>2-</sup>), sodium (Na), soil organic matter (SOM), total nitrogen (N), ammonium (N-NH<sub>4</sub><sup>+</sup>), nitrate (N-NO<sub>3</sub><sup>-</sup>), and pH — at the five stages of soil formation. The map was created using the software ArcGIS Pro v. 2.0 (<http://pro.arcgis.com/en/pro-app/>).

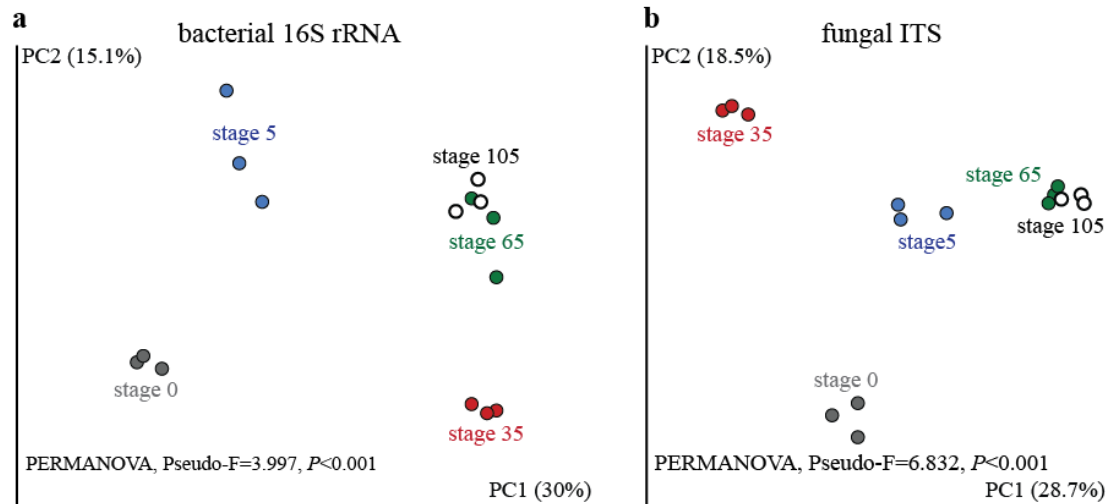

**Supplementary Fig. S2. Differences in bacterial and fungal  $\beta$ -diversities across the stages of soil formation.** (a) Bacterial and (b) fungal principal coordinate analyses (PCoA) based on Bray-Curtis distances calculated using the bacterial 16S rRNA and the fungal ITS amplicon sequencing data, respectively. PERMANOVA was performed using the homonymous routines in PRIMER6+ with  $10^3$  permutations (Supplementary Table S3).

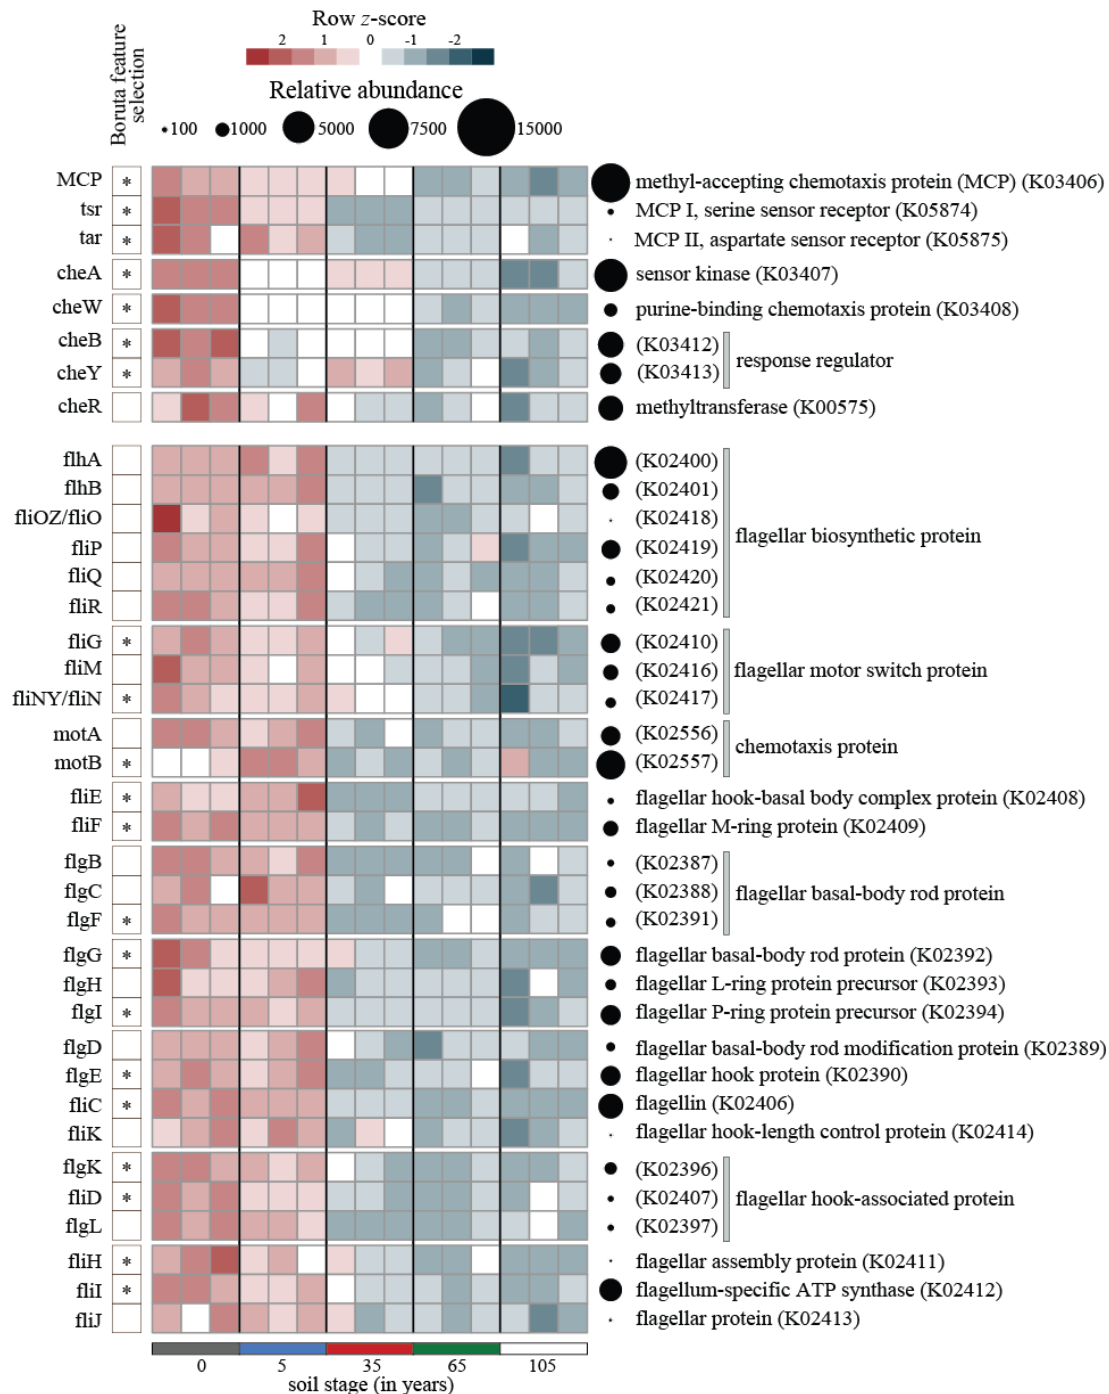

**Supplementary Fig. S3. Distribution of KOs involved in bacterial chemotaxis and flagellar assembly across the stages of soil formation – the ‘dispersal’ *modus*.** Heatmap displays the relative abundance (row z-scores) of the KOs involved in bacterial chemotaxis and flagellar assembly. Circles are proportional to the relative abundance of each KO in all samples. Asterisks denote KOs that differentially segregated across the soil stages, identified by random forest analysis with Boruta feature selection (average z-scores of 1000 runs > 4) (Supplementary Table S5).

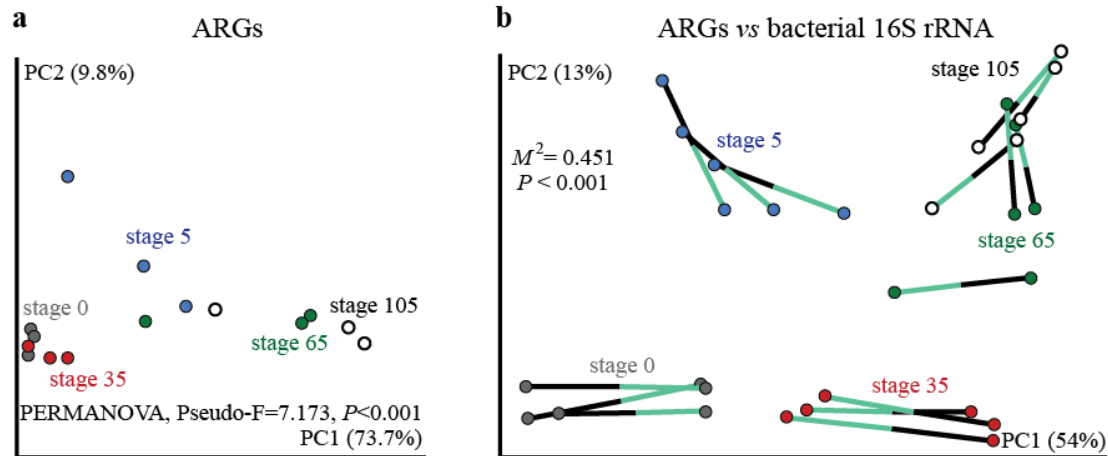

**Supplementary Fig. S4. Patterns of soil resistomes across the stages of soil formation.** (a) Principal coordinate analysis (PCoA) based on Bray-Curtis distances calculated from normalized ARG annotations. PERMANOVA was performed using the homonymous routines in PRIMER6+ with  $10^3$  permutations (Supplementary Table S3). (b) Procrustes analysis depicts the significant correlation between soil resistomes (Bray-Curtis) and bacterial community composition (Bray-Curtis) across the soil stages.

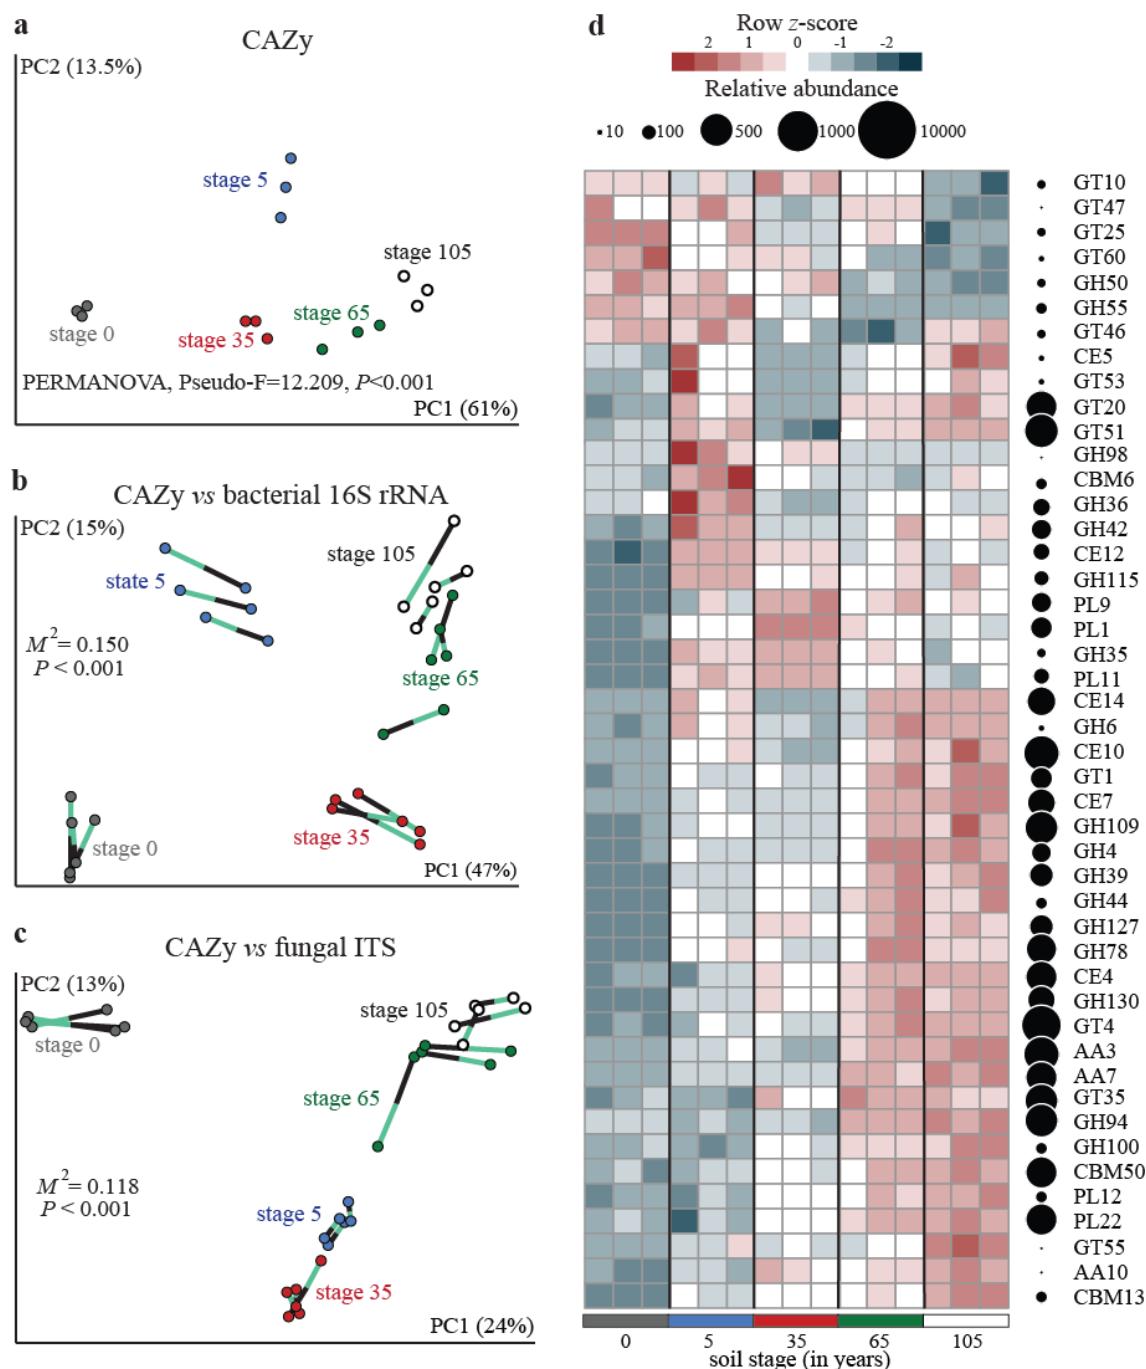

**Supplementary Fig. S5. CAZy profiles across the stages of soil formation.** (a) Principal coordinate analysis (PCoA) based on Bray-Curtis distances calculated from normalized CAZy family annotations. PERMANOVA was performed using the homonymous routines in PRIMER6+ with  $10^3$  permutations (Supplementary Table S3). Procrustes analyses depict significant correlations between CAZy profiles (Bray-Curtis) and bacterial (b) and fungal (c) community compositions (Bray-Curtis) across the soil stages. (d) Extended version of Fig. 3a that includes glycosyltransferase (GT) families. Heatmap displays the relative abundance (row z-scores) of CAZy gene families that differentially segregated across the soil stages, identified by random forest analysis with Boruta feature selection (average z-scores of 1000 runs  $> 4$ ) (Supplementary Table S5). Circles are proportional to the relative abundance of each gene family in all samples.
